# Supplementary material for: Evaluating the environmental impacts of dietary recommendations
Source: PubMed Central journal article supplement — Proc Natl Acad Sci U S A. 2017 Dec 4;114(51):13412–7. doi: 10.1073/pnas.1711889114 (PMC5754780; doi:10.1073/pnas.1711889114), 2017-12-04
Supplement: pnas.201711889SI.pdf [file pnas.201711889SI.pdf]

# Supporting Information

Behrens et al. 10.1073/pnas.1711889114

## Dietary Information

**Average Diets Composition.** FAO FBSs were used as the basis of the average diet composition for each nation (47). Food balance sheets already have wastes other than consumer waste subtracted. Because we are interested in the impacts of diets and not waste, we also subtracted consumer wastes per region and food group using FAO data (48). A concordance table for waste data between regions, nations, and food groups is available in Dataset S1 (sheet Waste\_Percentages). Fig. S1 shows the composition and size of the estimated, daily average diets by kcal, along with protein and fats as a percentage of total energy. For ease of assessment, we report the following dietary data in six aggregated food groups: meat, fish, dairy, grains, VFN, and other (e.g., sugars; for aggregation scheme, see Dataset S1, sheet Diet\_Classifications). Cultural and social variations in food intake are clearly visible across nations, for example, the high protein intake in Japan and the low number of calories from fats in middle-income nations. A table of kcal and weight intake for all 88 distinct food subgroups and all nations is available in Dataset S1 (sheets g\_per\_capita\_per\_day and kcal\_per\_capita\_per\_day).

**Nationally Recommended Diets.** Nationally recommended diets were built in two steps: first, the sourcing from the primary information provided by health and nutrition bodies, and second, the construction of NRD-compliant diets using previously obtained FAO data where needed. Sources for national recommended guidelines are given in Table S1; internet links for these diets are available in Dataset S1, sheet NRD\_overview. Nation-specific guidelines were found for 37 of the 44 nations available in the MRIO database. Given that further nation-specific guidelines were unavailable, the use of EXIOBASE rather than alternative MRIO datasets with more nations is appropriate. Concordances between guidelines and raw NRD data can be found in Dataset S1, sheet Diet\_Classifications. Portions were used from the NRDs themselves where available; in the few cases where portion data were unavailable, default values were used (52). Individual tables for the composition of diets of each nation along with further information are available in Dataset S1 (sheets 1\_Austria to 44\_South Africa). When guidelines suggest a choice between two food groups, with one total weight (i.e., 400 g fruit or vegetables), the two groups were split along currently consumed proportions from FBSs. Fig. S2 shows the composition of the raw suggestions in the NRDs.

As Fig. S2 shows, not all guidelines include all food groups, with Hungary and India omitting meat and fish, respectively, and Latvia and Norway along with Indonesia omitting dairy. To develop a representative diet compliant with recommendations, we took the assumption that if no recommendations were available for a food group, then the average consumption (less consumer waste) would be consumed.

**Comparison Between Average and Nationally Recommended Diets.** To investigate the influence of dietary volume on the differences between diets, an isocaloric and nonisocaloric comparison was made. To build this comparison, the average diet was isocalorically scaled to the nationally recommended diet but with the

assumption that empty calories would account for no more than 350 calories a day (on the general basis of guidance across all recommendations). Calorie data for each food group were derived from the FBS. Fig. S3 shows the isocaloric difference between diets, and Fig. S4 shows the nonisocaloric difference between diets.

## Environmental Impacts

**Concordance Between Food Categorizations.** Consumption-based environmental impacts were calculated using the EXIOBASE MRIO database. EXIOBASE itself was built with food sector categories from statistical information from the FAO giving a straightforward concordance between the two categorization schemes, where the 88 food subgroups in FAOSTAT were aggregated to the 17 food groups in EXIOBASE (see Dataset S1 for concordances, sheet Diet\_Classifications and full list of FAOSTAT subgroups for each EXIOBASE food group in sheet EXIOBASE\_Food\_Categories).

**Environmental Impact Indicators.** The three forms of environmental impact were chosen on the basis of the planetary boundary frameworks (19). The three indicators are GWP100 (88),  $\text{PO}_4^{3-}$  eq (54), and ha for greenhouse gases, eutrophication potential, and land, respectively. To show that  $\text{NO}_x$  eq as defined by ref. 89 has similar impacts to  $\text{PO}_4^{3-}$  eq we plot the correlation between the two in Fig. S10. These impacts were chosen because they are three of the four highest-risk impacts for which robust data are available. Absolute impacts for average diets are available in Fig. 1A. For completeness, Fig. S5 shows the absolute impacts of nationally recommended diets.

**Mapped Relative Changes.** Fig. S6 shows the mapped variations associated between nationally recommended and average diets for all three environmental impacts. Relative changes between the dietary choices are plotted, with a scaled region for Europe.

## Country Information

**Income Categories.** Country information and income categories were sourced from the World Bank (20). Table S2 shows the classifications for the countries included. Concordances are available in Dataset S1, sheet Country\_Classifications.

**Import Dependences.** Alterations in import patterns calculated with EXIOBASE are shown in Figs. S7–S9 as a percentage of total food-related environmental impacts per capita per day (or continuous land use for the year 2011 in the case of land). No assumption of changes in production structure is made. We focus on composition changes rather than volume changes in imports and so use isocaloric values. The largest global food producers show the lowest imports of embodied GHGs, for example, the United States, Brazil, Europe, and Australia. Japan, Russia, and Canada show large imports of embodied GHGs. Diets associated with NRDs increase import dependence in Australia and Canada while reducing import dependence significantly in Japan, and less so in Brazil, South Africa, India, and Russia.



















**Table S1. Sources for recommended diets by nation**

| Country         | Source                                                                                                                                         |
|-----------------|------------------------------------------------------------------------------------------------------------------------------------------------|
| Australia       | National Health and Medical Research Council (56)                                                                                              |
| Brazil          | Ministry of Health of Brazil (59)                                                                                                              |
| China           | Chinese Nutrition Society (61)                                                                                                                 |
| Finland         | Valtion ravitsemusneuvottelukunta (64)                                                                                                         |
| Greece          | Ministry of Health (67)                                                                                                                        |
| Ireland         | Food Safety Authority of Ireland (69)                                                                                                          |
| Japan           | Ministry of Health, Labour and Welfare and Ministry of Agriculture, Forestry and Fisheries (70)                                                |
| The Netherlands | Brink et al. (73)                                                                                                                              |
| Portugal        | Direção-Geral da Saúde (75)                                                                                                                    |
| South Korea     | Park et al. (78)                                                                                                                               |
| Switzerland     | Schweizerische Gesellschaft für Ernährung (81)                                                                                                 |
| United Kingdom  | Public Health England in association with the Welsh Government, Food Standards Scotland and the Food Standards Agency in Northern Ireland (84) |
| United States   | US Department of Health and Human Services and US Department of Agriculture (22)                                                               |
| Austria         | Ministerium für Gesundheit (57)                                                                                                                |
| Croatia         | Degac et al. (24)                                                                                                                              |
| Denmark         | Ministeriet for Fødevarer, Landbrug og Fiskeri (62)                                                                                            |
| France          | Programme National Nutrition Santé (65)                                                                                                        |
| Hungary         | Imre et al. (23)                                                                                                                               |
| Indonesia       | Usfar and Fahmida (51)                                                                                                                         |
| Latvia          | Veselības ministrija (71)                                                                                                                      |
| Malta           | Health Promotion & Disease Prevention Directorate (74)                                                                                         |
| Norway          | Helsedirektoratet (76)                                                                                                                         |
| Romania         | Graur et al. (79)                                                                                                                              |
| Slovenia        | Ribic (82)                                                                                                                                     |
| Spain           | Mari et al. (85)                                                                                                                               |
| Turkey          | Ministry of Health (87)                                                                                                                        |
| Belgium         | Minister van Sociale Zaken en Volksgezondheid (58)                                                                                             |
| Canada          | Health Canada (60)                                                                                                                             |
| Cyprus          | Ministry of Health (63)                                                                                                                        |
| Estonia         | National Institute for Health Development (66)                                                                                                 |
| Germany         | German Nutrition Society (68)                                                                                                                  |
| India           | National Institute of Nutrition (21)                                                                                                           |
| Italy           | Ministero delle Politiche Agricole e Forestali (72)                                                                                            |
| Mexico          | Arenas et al. (17)                                                                                                                             |
| Poland          | Chabros et al. (77)                                                                                                                            |
| Russia          | Rosminzdrav (80)                                                                                                                               |
| South Africa    | Vorster et al. (83)                                                                                                                            |
| Sweden          | Brugård Konde et al. (86)                                                                                                                      |

**Table S2. Country income classifications**

| Classification     | Nations                                                                                                                                                                                                |
|--------------------|--------------------------------------------------------------------------------------------------------------------------------------------------------------------------------------------------------|
| Low–middle income  | India and Indonesia                                                                                                                                                                                    |
| High–middle income | Romania, China, Brazil, Mexico, Russia, Turkey, and South Africa                                                                                                                                       |
| High-income EU     | Austria, Belgium, Cyprus, Germany, Denmark, Estonia, Spain, Finland, France, Greece, Croatia, Hungary, Ireland, Italy, Latvia, The Netherlands, Poland, Portugal, Sweden, Slovenia, and United Kingdom |
| High-income ROW    | United States, Japan, Canada, South Korea, Australia, Switzerland, and Norway                                                                                                                          |

## Other Supporting Information Files

[Dataset S1 \(XLSX\)](#)
